# Supplementary material for: Cell-to-Cell Transmission Can Overcome Multiple Donor and Target Cell Barriers Imposed on Cell-Free HIV
Source: PLOS journal article supplement (doi:10.1371/journal.pone.0053138), 2013-01-07

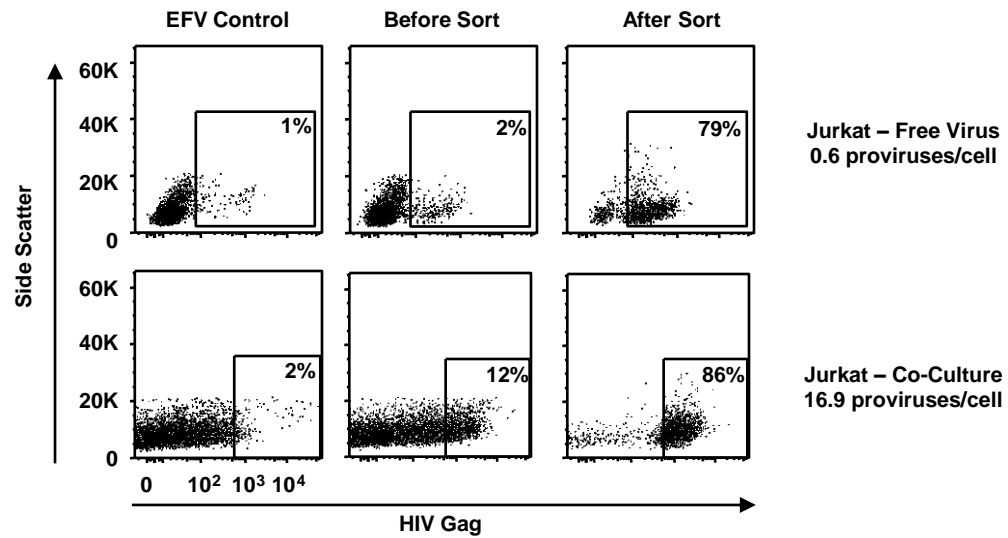

Supplement: S5 (10.1371/journal.pone.0053138.s005) [file redirect.do]
